# Supplementary material for: Genomes from uncultivated prokaryotes: a comparison of metagenome-assembled and single-amplified genomes
Source: PubMed Central journal article supplement (PMC6162917; doi:10.1186/s40168-018-0550-0), 2018-09-28

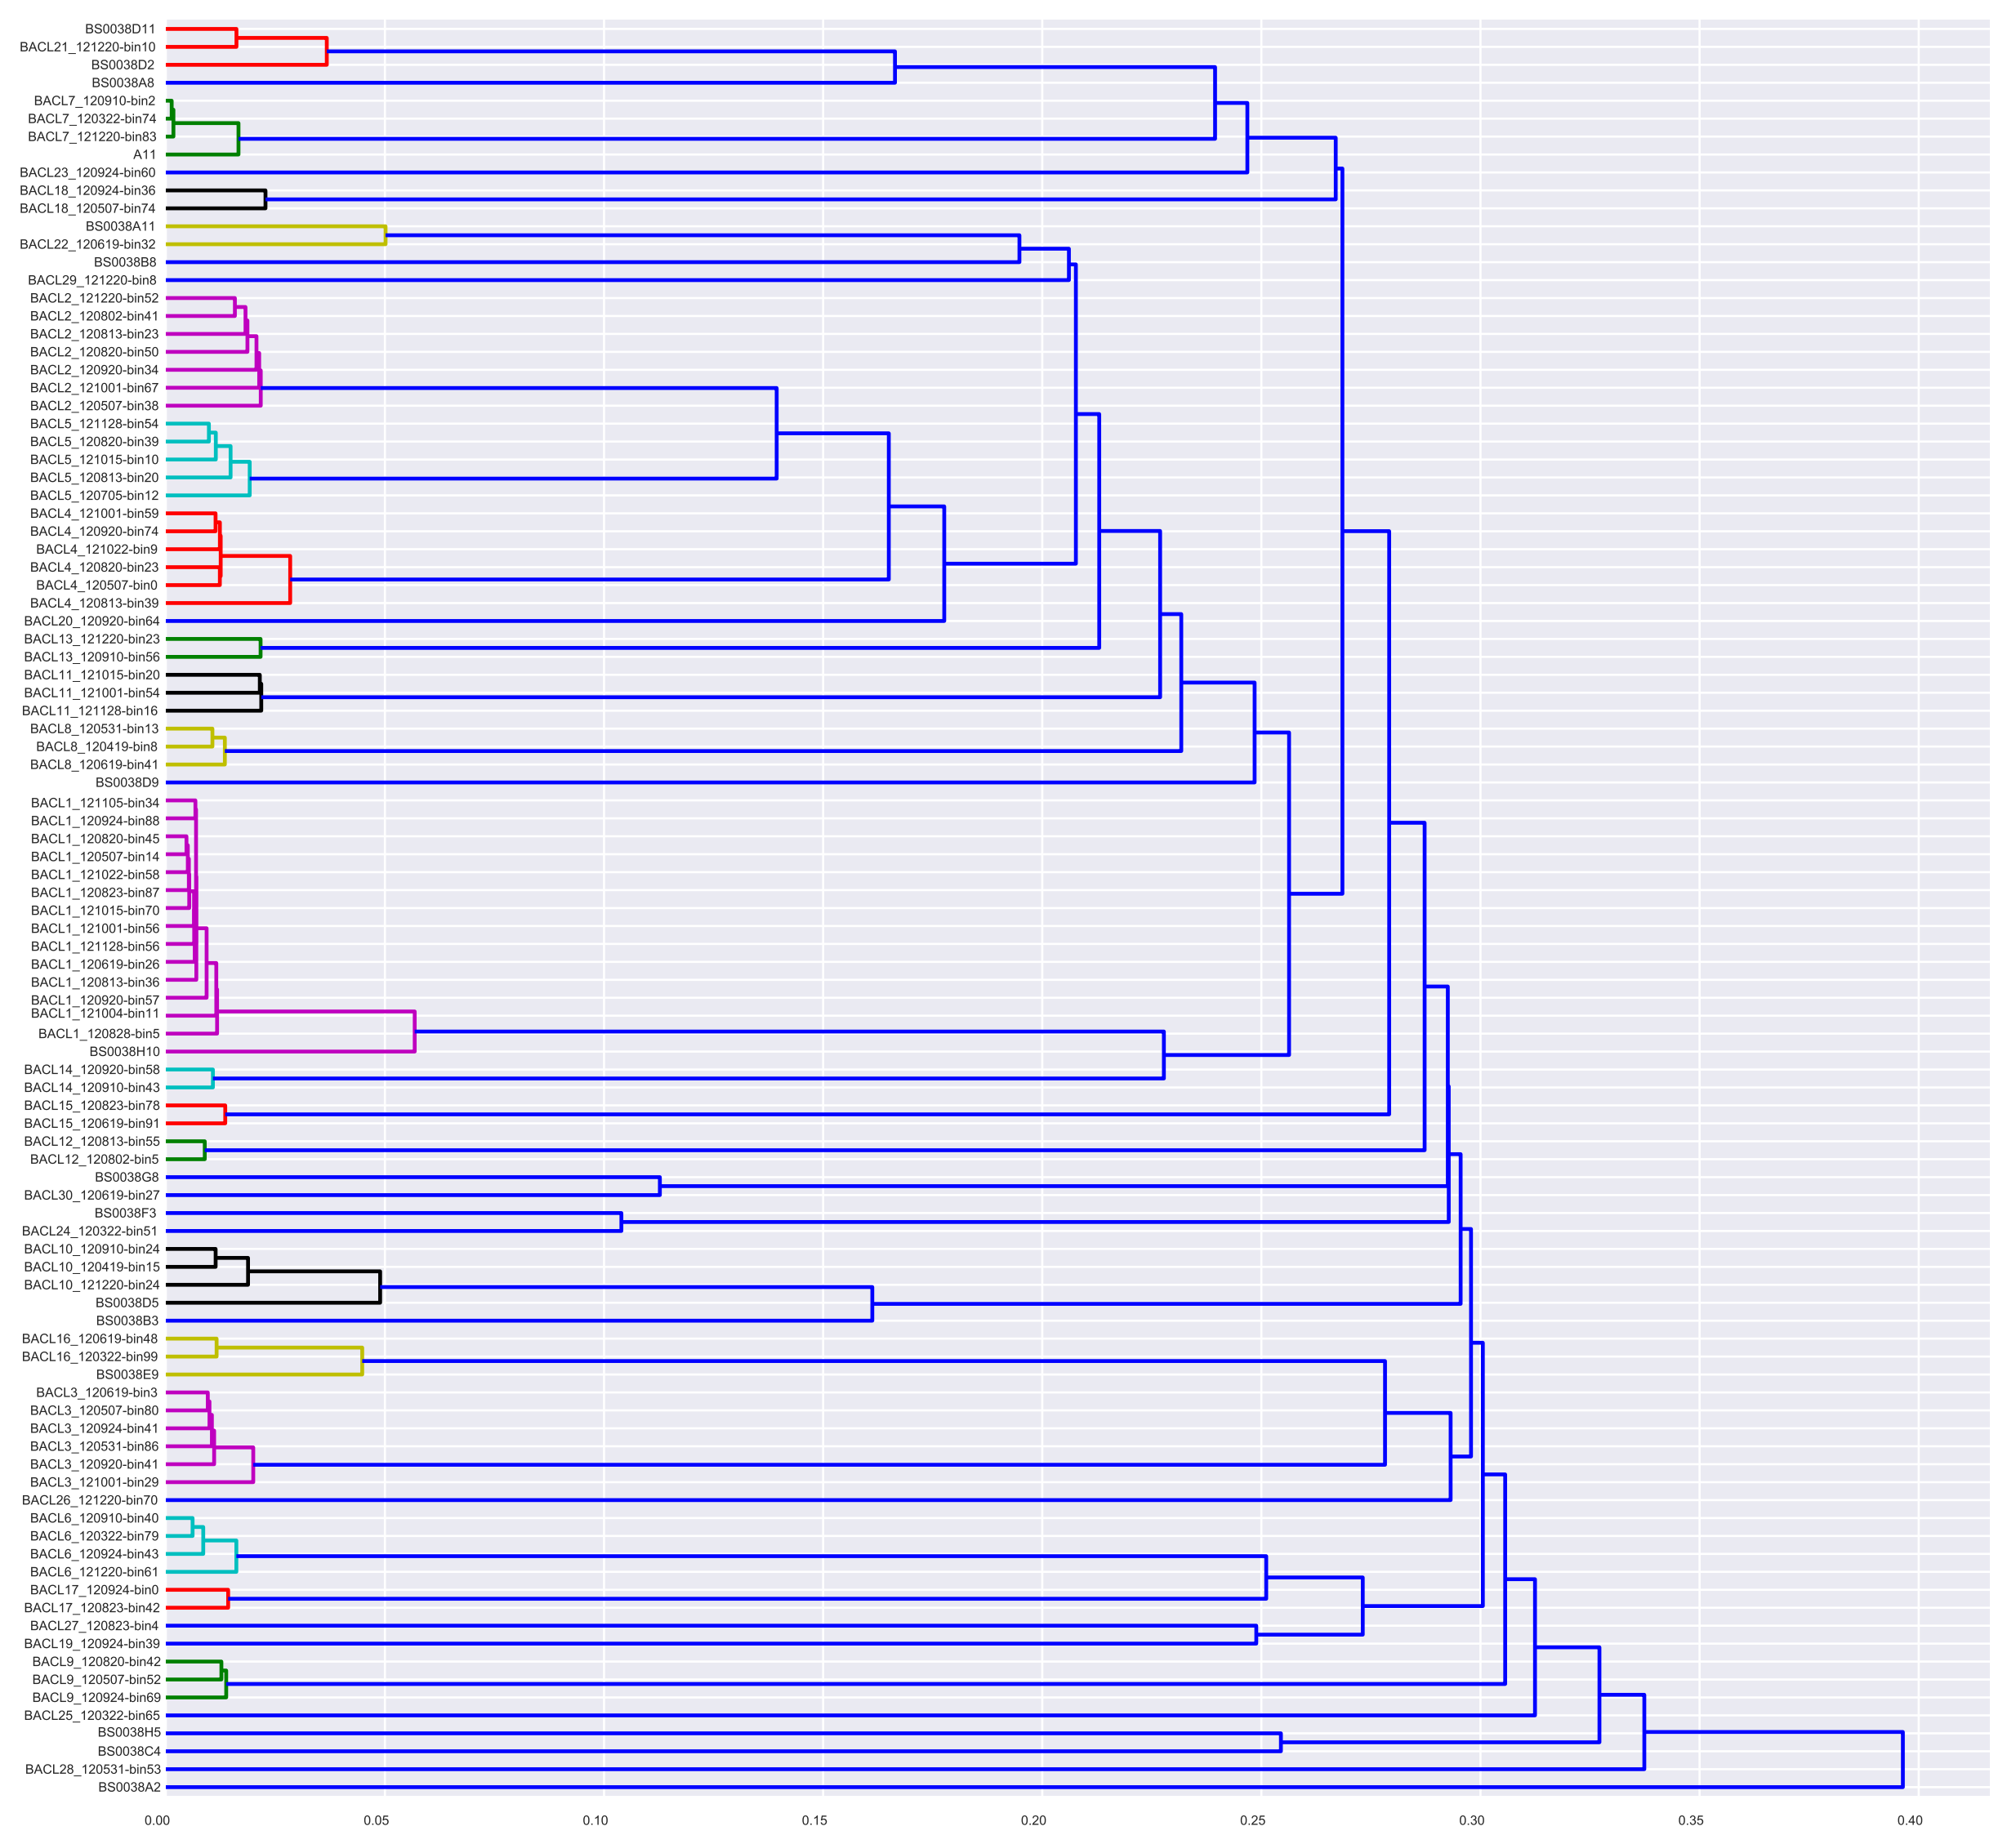

Supplement: 40168_2018_550_MOESM2_ESM.pdf [file 40168_2018_550_MOESM2_ESM.pdf]
