# Supplementary material for: Genomes from uncultivated prokaryotes: a comparison of metagenome-assembled and single-amplified genomes
Source: PubMed Central journal article supplement (PMC6162917; doi:10.1186/s40168-018-0550-0), 2018-09-28
Supplement: 40168_2018_550_MOESM3_ESM.pdf [file 40168_2018_550_MOESM3_ESM.pdf]

OTU000013;SAR86

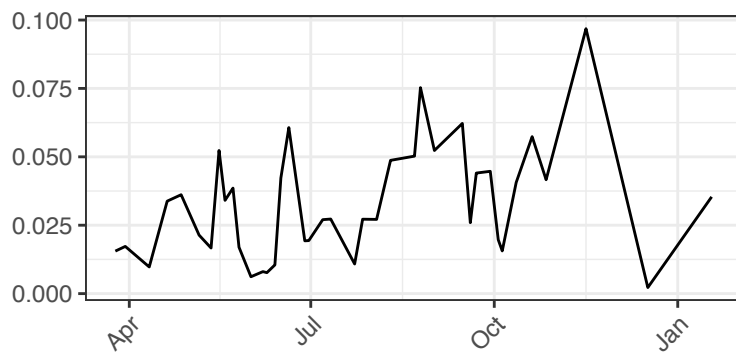

BACL1;SAR86

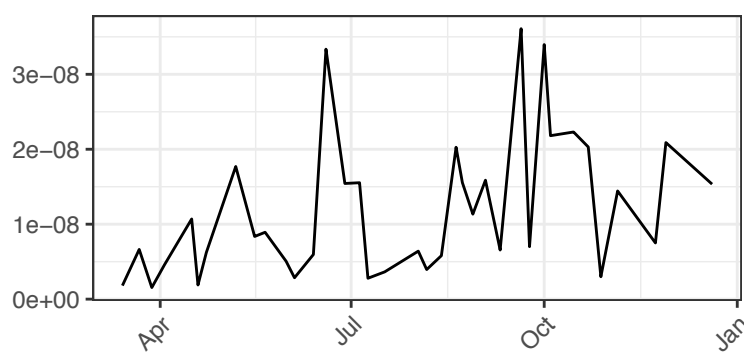

OTU000021;Owenweeksia

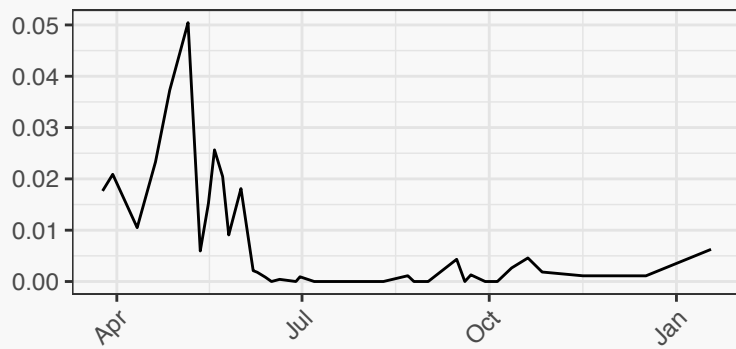

BACL7;Owenweeksia

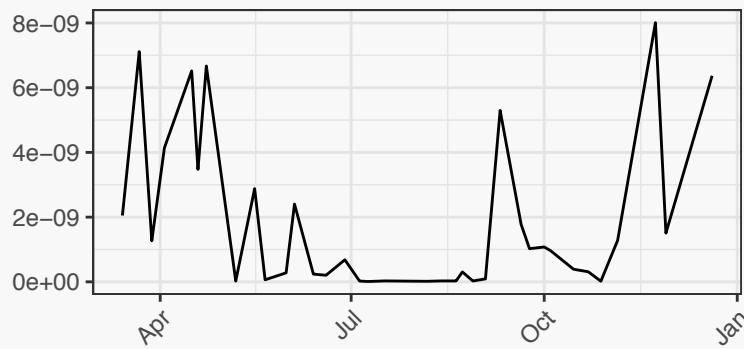

OTU000011;Rhodobacteraceae

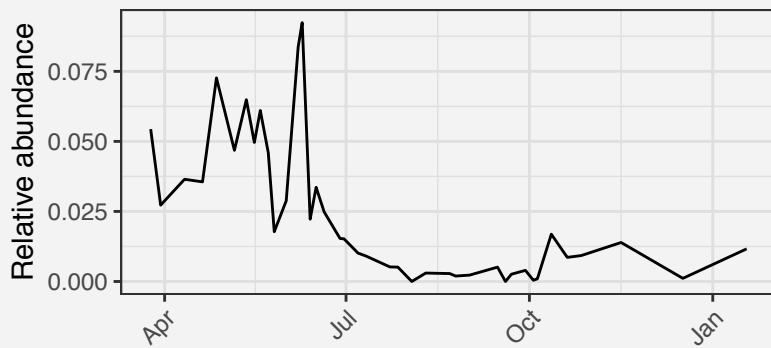

BACL10;Rhodobacteraceae

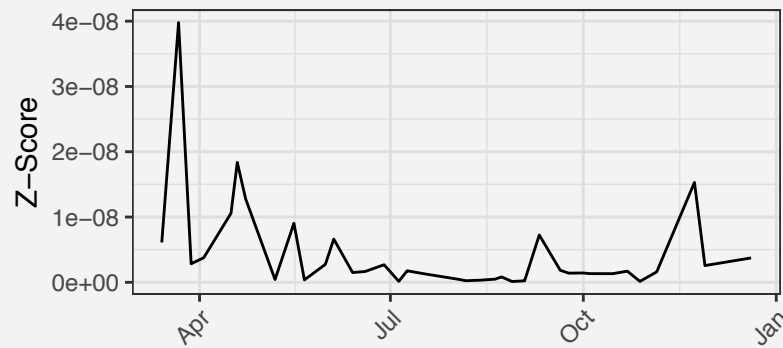

OTU000043;SAR92

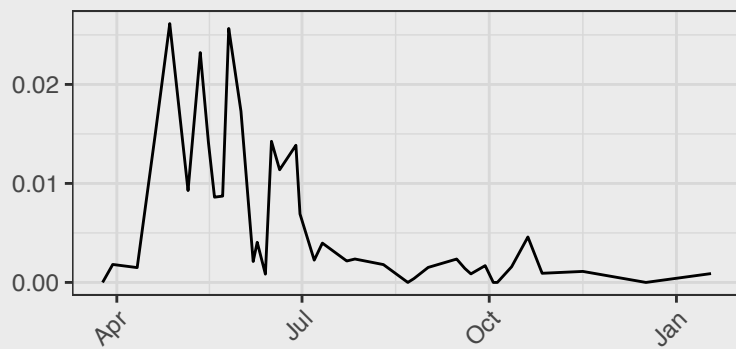

BACL16;SAR92

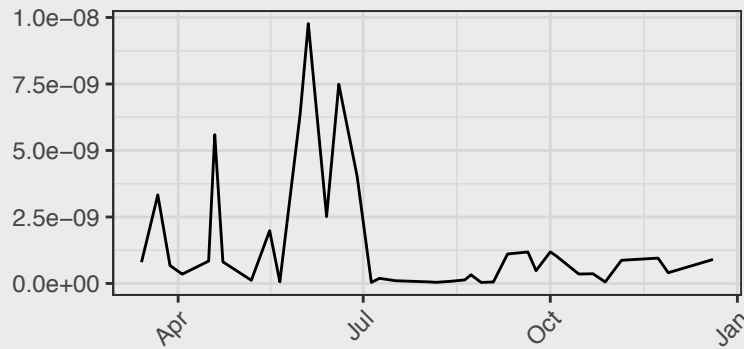

OTU000004;Flavobacteriaceae

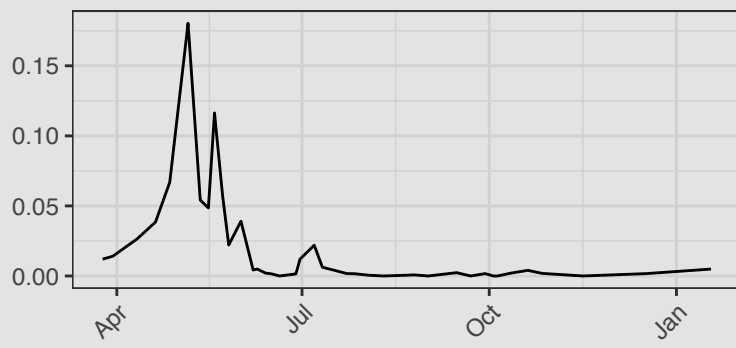

BACL21;Flavobacteriaceae

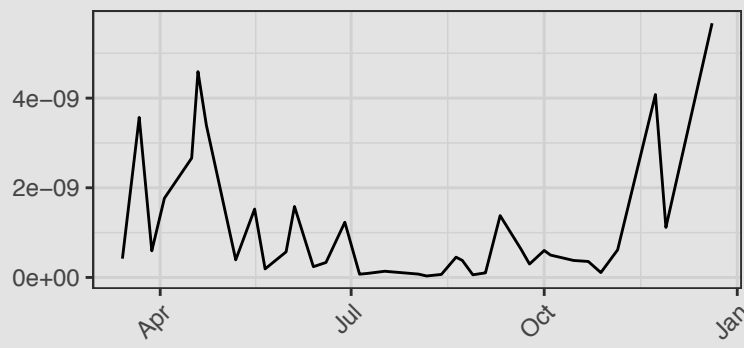

Date (2011)

Date (2012)
