# Supplementary material for: Genomes from uncultivated prokaryotes: a comparison of metagenome-assembled and single-amplified genomes
Source: PubMed Central journal article supplement (PMC6162917; doi:10.1186/s40168-018-0550-0), 2018-09-28

**a** SAG Contigs with < 5% aligned to MAG

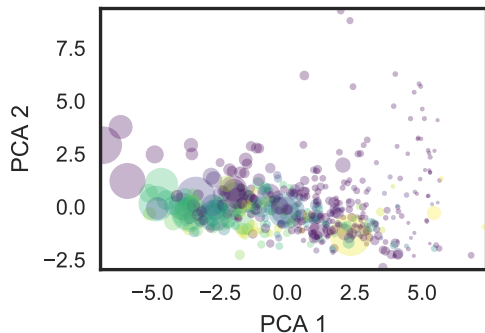

**b** SAG Contigs with > 5% aligned to MAG

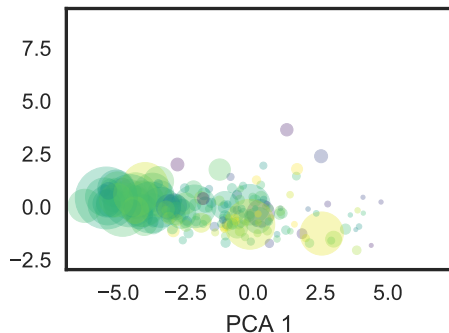

Metagenome avg. coverage depth  
PCA 2

**c**

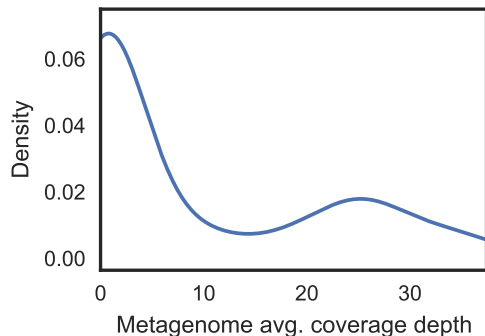

Contig lengths

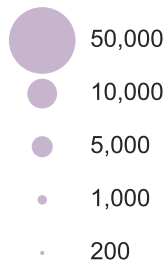

**d**

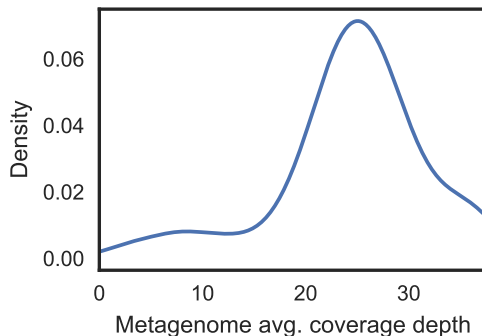

Supplement: 40168_2018_550_MOESM12_ESM.pdf [file 40168_2018_550_MOESM12_ESM.pdf]
