# Supplementary material for: Genomes from uncultivated prokaryotes: a comparison of metagenome-assembled and single-amplified genomes
Source: Microbiome. 2018 Sep 28;6:173. doi: 10.1186/s40168-018-0550-0 (PMC6162917; doi:10.1186/s40168-018-0550-0)
Supplement: Supplementary file 5 — Table S3. Distribution of metagenome bases covered by SAG reads mapped against the corresponding metagenome assemblies. “Estimated False Negative Rate in Binning (%)” was calculated by dividing the number of “Bases covered within long (≥ 1 kb) non-MAG contigs” with the number of “Nucleotide bases covered within MAG contigs.” (XLSX 10 kb) [file 40168_2018_550_MOESM5_ESM.xlsx]

## Sheet: covered_bases_in_metagenome_sta
MAG	SAG	Cluster	Nucleotide bases covered within MAG contigs	Bases covered within long (≥1 kb) non-MAG contigs	Bases covered within short (<1 kb) contigs	Estimated False Negative Rate in Binning (%)
120507-bin14	BS0038H10	BACL1	384446	2027	24840	0.52
120619-bin26	BS0038H10	BACL1	373289	7420	57981	1.95
120813-bin36	BS0038H10	BACL1	334690	2303	13204	0.68
120820-bin45	BS0038H10	BACL1	382947	2727	24396	0.71
120823-bin87	BS0038H10	BACL1	392298	2132	24649	0.54
120828-bin5	BS0038H10	BACL1	283024	41250	13748	12.72
120920-bin57	BS0038H10	BACL1	242733	18190	75593	6.97
120924-bin88	BS0038H10	BACL1	329542	1827	28534	0.55
121001-bin56	BS0038H10	BACL1	301301	3937	50037	1.29
121004-bin11	BS0038H10	BACL1	279962	36149	17474	11.44
121015-bin70	BS0038H10	BACL1	388853	4011	25911	1.02
121022-bin58	BS0038H10	BACL1	392718	789	25577	0.2
121105-bin34	BS0038H10	BACL1	318127	709	21374	0.22
121128-bin56	BS0038H10	BACL1	400887	2093	22453	0.52
120322-bin74	A11	BACL7	1087803	41635	41781	3.69
120910-bin2	A11	BACL7	796840	27354	31752	3.32
121220-bin83	A11	BACL7	945380	53538	81562	5.36
120419-bin15	BS0038D5	BACL10	822407	36771	189070	4.28
120910-bin24	BS0038D5	BACL10	810062	32899	169948	3.9
121220-bin24	BS0038D5	BACL10	535353	24929	127656	4.45
120322-bin99	BS0038E9	BACL16	488461	53099	70574	9.8
120619-bin48	BS0038E9	BACL16	1031949	28932	18969	2.73
121220-bin10	BS0038D11	BACL21	1217489	64765	86576	5.05
121220-bin10	BS0038D2	BACL21	840780	33894	42877	3.88
120619-bin32	BS0038A11	BACL22	661123	34435	34045	4.95
					Average:	3.6296
